# Supplementary material for: A Brief History of the Major Rickettsioses in the Asia–Australia–Pacific Region: A Capstone Review for the Special Issue of TMID
Source: PubMed Central journal article supplement (PMC7709643; doi:10.3390/tropicalmed5040165), 2020-10-27
Supplement: tropicalmed-05-00165-s001.pdf [file tropicalmed-05-00165-s001.pdf]

**Table S1.** Historical Chronology of Milestones - the Gradual Dissection of the “Typhus” Entity.

| Year                     | Important findings                                                                                                               | Comments                                                         | Ref.     |
|--------------------------|----------------------------------------------------------------------------------------------------------------------------------|------------------------------------------------------------------|----------|
| 460 BC                   | Hippocrates defines typhus - as “fever with a confused state of the intellect - a tendency to stupor”.                           |                                                                  | [1]      |
| 430 BC                   | Thucydides and Hippocrates first describe epidemic typhus cases.                                                                 |                                                                  | [2]      |
| 313 BC                   | First clinical accounts of <i>Tsutsugamushi disease</i> in the “ <i>Zhouhofang</i> ”, a Chinese clinical manual.                 | Description of regional vector mites, no linkage to transmission | [3]      |
| 15 <sup>th</sup> century | Epidemic typhus and endemic typhus ( <i>Tabardillo</i> ) rages in Europe.                                                        | No distinction made between different forms of typhus            | [4]      |
| 1485–1551                | The five epidemics known as the ‘English Sweat’ occur in the United Kingdom.                                                     | Probably relapsing fever ( <i>Borrelia recurrentis</i> )         | [5, 6]   |
| 1546                     | Girolamo Fracastoro–Fracastorius (1478–1553) differentiates typhus from plague in <i>De contagione et contagiosis morbis</i> .   |                                                                  | [7-9]    |
| Early 1700s              | Typhus = Typhoid and Typhus and ‘Relapsing Fever’                                                                                | Era of differential diagnostic confusion!                        | [10–13]  |
| 1750                     | John Huxham made the first distinction between epidemic typhus and typhoid fever in the United Kingdom.                          | Typhus = “slow nervous” fever Typhoid = “putrid malignant” fever | [10]     |
| 1760                     | Boisier de Sauvages in Montpellier creates the clinical term “ <i>Typhus exanthematicus</i> ” for epidemic typhus.               | Based on clinical appearance of characteristic skin rash         | [14]     |
| 1762                     | James Lind (1716–1794) promotes hygienic measures during typhus outbreaks to reduce mortality.                                   | Limes for prevention of scorbud.                                 | [8,9]    |
| 1810                     | Hakuju Hashimoto first described a <i>tsutsuga</i> (disease, harm, noxious) resembling typhus, in the Niigata prefecture, Japan. | The basis of the name ‘ <i>Tsutsugamushi disease</i> ’           | [15]     |
| 1812–1813                | Napoleon suffers the greatest loss of troops in eastern Europe to epidemic typhus (and Trench Fever).                            |                                                                  | [16,17]  |
| 1837                     | William W. Gerhard (1809–72), first distinguished enteric fevers (i.e. typhoid) from rickettsial fevers (i.e. typhus).           | Post-mortem hyperplastic nodules in Peyer’s patches              | [11, 18] |
| 1843                     | Craigie and Hendersen differentiate relapsing fevers clinically and pathologically from (epidemic) typhus                        | Post-mortem observations in autopsies                            | [12, 19] |

|      |                                                                                                                                                            |                                                                      |         |
|------|------------------------------------------------------------------------------------------------------------------------------------------------------------|----------------------------------------------------------------------|---------|
| 1858 | Charles Murchison epidemiologically emphasizes the contagious nature of typhus – association of epidemics with poor hygienic standards                     |                                                                      | [20]    |
| 1878 | First account of <i>Tsutsugamushi</i> disease from Japan to be published in Europe by Theobald Palm.                                                       | Reported as Shima-mushi, or Island insect disease                    | [21]    |
| 1898 | Brill Disease-an outbreak of atypical typhus, what Brill called abortive-typhoid in New York                                                               |                                                                      | [22,23] |
| 1906 | Howard T. Ricketts and Russel M. Wilder discover the causative agent and transmission vector (wood tick) of Rocky Mountain spotted fever (RMSF).           |                                                                      | [24]    |
| 1908 | Schüffner describes “Pseudo-typhoid” in Sumatra (later revealed to be <i>Tsutsugamushi</i> disease).                                                       | Suspected mite transmission                                          | [25]    |
| 1909 | Charles J.H. Nicolle discovers the transmission of epidemic typhus by the human body louse.                                                                | Nobel Prize in 1928                                                  | [26,27] |
| 1910 | Howard T. Ricketts first discovers rickettsiae in the blood of epidemic typhus patients in Mexico (“ <i>Tabardillo</i> ”), together with Russel M. Wilder. | Ricketts dies of epidemic typhus in Mexico 1910                      | [28–30] |
| 1916 | Rocha Lima who officially first described epidemic typhus rickettsiae as intracellular microorganisms.                                                     | <i>R. prowazekii</i> - named after Ricketts and Prowazek             | [31]    |
| 1910 | Smithson describes a “sporadic” form of typhus, in Australia.                                                                                              | Later revealed as scrub typhus or <i>Tsutsugamushi</i> disease       | [32]    |
| 1910 | Conor and Bruch describe “Fievre Boutonneuse” in Tunis.                                                                                                    | Later revealed as Mediterranean Spotted Fever (MSF)                  | [33]    |
| 1911 | McNaught describes “Para-typhoid” in South Africa, with suspected tick transmission.                                                                       | Later revealed to be two forms; MSF and African Tick Typhus          | [34,35] |
| 1913 | McKenchie describes a typhus-like illness in the Kumaon Region, N-India (Himalayan foothills).                                                             | unpublished, reviewed by Megaw 1921–“Megaw’s tick bite” in 1916      | [36]    |
| 1916 | Weil and Felix first describe the diagnostic serum agglutination for typhus. Based on <i>Proteus vulgaris</i> strain called “ <i>Proteus X 19</i> .”       | Diagnostic breakthrough                                              | [37]    |
| 1922 | Hone describes a new form of typhus in Australia (OX19 positive)                                                                                           | Later revealed as <i>R. honei</i> , a spotted fever group rickettsia | [38]    |

|           |                                                                                                        |                                                                              |         |
|-----------|--------------------------------------------------------------------------------------------------------|------------------------------------------------------------------------------|---------|
| 1923      | Maxcy and Havens describe murine typhus as an endemic form of sporadic typhus.                         | Hypothesis that fleas are vectors                                            | [39]    |
| 1924      | Kingsbury visits Malaya and brings a new strain <i>Proteus mirabilis</i> OXK                           | OXK allows separation of "urban" and "rural" typhus                          | [40]    |
| 1924      | Fletcher distinguishes scrub from murine typhus.                                                       | Based on the Weil-Felix test using <i>Proteus</i> OX19 and OXK               | [41]    |
| 1926      | Fletcher and Lesslar describe co-existence of <i>Tsutsugamushi</i> disease and scrub typhus in Malaya. |                                                                              | [42,43] |
| 1926      | Fletcher and Lesslar create the term 'tropical typhus'.                                                | Defined as non-contagious or "sporadic" typhus-like fevers.                  | [40]    |
| 1928      | Scrub typhus is <i>Tsutsugamushi</i> disease.                                                          | Based on entomological, cross-immunity and clinical criteria.                | [41-45] |
| 1930      | Nagayo demonstrates <i>Rickettsia orientalis</i> for the first time.                                   | Localization in the Descemet's membrane of rabbit eyes.                      | [46]    |
| 1931      | Dyer proves Maxcy right—murine typhus is transmitted by rat fleas.                                     | Dyer isolates <i>Rickettsia</i> from rat fleas ( <i>Xenopsylla cheopis</i> ) | [47]    |
| 1945      | "Operation Tyburn"—first mass-production of scrub typhus vaccine.                                      | Based on New Guinea strain (Karp), did not work in Malaya.                   | [48–51] |
| 1947      | Discovery of Chloromycetin, a derivative from <i>Actinomyces</i> bacteria                              | Cured chick embryos infected with rickettsiae                                | [52]    |
| 1948      | Smadel demonstrates chloramphenicol as an effective chemotherapy for scrub typhus.                     | Volunteer studies with naturally infected chigger inoculation                | [52,53] |
| 1959–1975 | Vietnam Conflict—Scrub typhus is the leading cause of fevers of unknown origin (FUO).                  |                                                                              | [54]    |
| 1997      | Epidemic typhus re-emerged dramatically in Burundi.                                                    | Epidemic affects approx. 100,000 refugees of Rwanda.                         | [55,56] |

## References

1. Lloyd, G.E.R., Chadwick J, Mann WN; *Hippocratic Writings*; Repr. ed.; Penguin Books: London, **1983**, 380 p.
2. Weiss K. The role of rickettsioses in history; In: *Biology of rickettsial diseases. Volume 1*. Edited by Walker D.H. , Boca Raton, FL, CRC Press, **1988**, 1-14.
3. Kawamura Jr, A., Tanaka H, Tamura A; *Tsutsugamushi Disease*. Tokyo University Press: Tokyo, **1995**, 362 pp.
4. Harden, V.A. Typhus, epidemic. *The Cambridge World History of Human Disease* **1993**, 1080-1084, DOI:10.1017/CHOL9780521332866.213.
5. Caius, J.: *A Boke Or Counseill Against the Disease Called the Sweate (1552)*; Scholars' facsimiles & reprints: New York, **1937**, 1 p. of leaves, xix p., facsim.
6. MacArthur, W. Famine fevers in England and Ireland. *Ulster Med J* **1948**, 17, 28-33.
7. Fracastoro, G.: *Hieronymi Fracastorii De Contagione Et Contagiosis Morbis Et Eorum Curatione: Libri III (1546) [Translation and Notes.]*; Putnam: New York, **1930**, 356 p.
8. Prinzing, F.: *Epidemics Resulting from Wars*; Oxford: Clarendon Press: London., **1916**, xii + 340 + 6 p. appendix.
9. Lind, J.: *An Essay on the most Effectual Means of Preserving the Health of Seamen: In the Royal Navy*. D. Wilson: Lindon, **1762**, xxiv + 143 + 6 p addendum.
10. Huxham, J.: *An Essay on Fevers and their various Kinds (etc.)* ; 2nd ed.; Austen: Lomdon, **1750**, XV + 288 p.
11. Gerhard, W.W. ART. I. on the typhus fever, which occurred at Philadelphia in the spring and summer of 1836; illustrated by clinical observations at the Philadelphia hospital; showing the distinction between this form of disease and dothinerteritis or the typhoid fever with alteration of the follicles of the small intestine. *The American Journal of the Medical Sciences* **1837**, 19, 288-315.
12. Henderson, W. On some of the characters which distinguish the fever at present epidemic from typhus fever. *Edinburgh Med.Surg.J* **1844**, 61, 201-225.
13. Jenner, W.: *On the Identity Or Non-Identity of Typhoid and Typhus Fevers*; John Churchill: London, **1850**, vii + 102 p.
14. Hansen, W.; Freney, J.; Le typhus épidémique, sa transmission et la découverte de l'agent étiologique. *Lyon Pharmaceutique* **1996**, 3, 130-138.
15. Shao, P. You Xing and Hakuju Hashimoto - pioneers of epidemic doctrine in the history of diseases in China and Japan (in Japanese) . *Journal of the Japanese Society for the History of Medicine (Nihon Ishigaku Zasshi)* **2001**, 47, 604-605.
16. Peterson, R.K.D. Insects, disease, and military history. *Am Entomol* **1995**, 41, 147-161, DOI:10.1093/ae/41.3.147.
17. Raoult, D.; Dutour, O.; Houhamdi, L.; Jankauskas, R.; Fournier, P.E.; Ardagna, Y.; Drancourt, M.; Signoli, M.; La, V.D.; Macia, Y.;Aboudharam, R.; Evidence for louse-transmitted diseases in soldiers of Napoleon's grand army in Vilnius. *J Infect Dis* **2006**, 193, 112-120, DOI:10.1086/498534.
18. JAMA Editorial. W. W. Gerhard, typhoid vs. typhus fever. *JAMA : The Journal of the American Medical Association* **1962**, 181, 154-155, DOI:10.1001/jama.1962.03050280084012.

19. Craigie, D. Notice of a febrile disorder which has prevailed at Edinburgh during the summer of 1843. *Edinburgh Medical and Surgical Journal* **1843**, 60, 410.
20. Murchison, C. Typhus fever. *Br Med J* **1858**, 1, 994.
21. Palm, T.A. Some account of a disease called " shima-mushi," or " island-insect disease," by the natives of Japan; peculiar, it is believed, to that country, and hitherto not described. *Edinburgh Medical Journal* **1878**, 24, 128.
22. Brill, N.E. An acute infectious disease of unknown origin - A clinical study based on 221 cases. *Am J Med Sci* **1910**, 139, 484-502.
23. Brill, N.E. Pathological and experimental data derived from a further study of an acute infectious disease of unknown origin. *The American Journal of the Medical Sciences (1827-1924)* **1911**, 142, 196-218.
24. Ricketts, H.T. The transmission of rocky mountain spotted fever by the bite of the wood-tick (*Dermacentor occidentalis*). *Journal of the American Medical Association* **1906**, XLVII, 358, DOI:10.1001/jama.1906.25210050042002j.
25. Schüffner, W.; Wachsmuth, M.; Über eine typhusartige erkrankung (pseudotyphus von deli). *Z Klin Med* **1910**, 71, 133-156.
26. Gross, L. How Charles Nicolle of the Pasteur institute discovered that epidemic typhus is transmitted by lice: Reminiscences from my years at the Pasteur institute in Paris. *Proc Natl Acad Sci U S A* **1996**, 93, 10539.
27. Nicolle, C.; Comte, C.; Conseil, E.; Transmission expérimentale du typhus exanthématique par le pou du corps. *C. R. Acad. Sci.* **1909**, 149, 486-489.
28. Ricketts, H.T.; Wilder, R.M.; Further investigations regarding the etiology of tabardillo, Mexican typhus fever. *J Am Med Assoc* **1910**, 55, 309-311, DOI:10.1001/jama.1910.04330040045015.
29. Ricketts, H.T.; Wilder, R.M.; The relation of typhus fever (tabardillo) to rocky mountain spotted fever. *Arch Intern Med* **1910**, 5, 361-370.
30. Ricketts, H.T.; Wilder, R.M.; The typhus fever of mexico (tarbadillo) preliminary observations. *J Am Med Assoc* **1910**, 54, 463-467.
31. da Rocha-Lima, H. Zur aetiologie des fleckfiebers. *DMW-Deutsche Medizinische Wochenschrift* **1916**, 42, 1353-1354.
32. Smithson, O. Mossman fever. *J.Trop.Med Hyg* **1910**, 13, 351-352.
33. Conor, A.; Brush, A.; Une fièvre boutonneuse observée en Tunisie. *Bulletin De La Societe De Pathologie Exotiques Et Filiales* **1910**, 8, 492-496.
34. McNaught, J.G. A note on two cases of paratyphoid fever in which a new variety of paratyphoid bacillus was found in the blood. *BMJ Military Health* **1908**, 10, 171-174.
35. Troup, J.M.; Pijper, A.; Tick-bite fever in southern Africa. *Lancet* **1931**, .
36. Megaw, J. A typhus-like fever in India, possibly transmitted by ticks. *The Indian Medical Gazette* **1921**, 56, 361-371.
37. Weil, E.; Felix, E.; Zur serologischen diagnose des fleckfiebers. *Wien Klin Wochenschr* **1916**, 29, 33-35.
38. Hone, F.S. A series of cases closely resembling typhus fever. *Med J Aust* **1922**, 1, 1-13.
39. Maxcy, K.F.; Havens, L.C.; A series of cases giving a positive Weil-Felix reaction. *Am J Trop Med Hyg* **1923**, s1-3, 495-507, DOI:10.4269/ajtmh.1923.s1-3.495.

40. Audy J. R.; Savoor S. R.; Typhus; In: *The Institute for Medical Research 1900-1950 by various authors; Studies from the Institute for Medical Research, no. 25.* Edited by Field J.W.; Green R.; Byron F. E.; , **1951**, .
41. Fletcher, W.; Lesslar, J.E.; Tropical typhus and Brill's disease. *J Trop Med Hyg* **1926**, 29, 374-378.
42. Fletcher, W.; Lesslar, J.E.;Lewthwaite, R.; The aetiology of the tsutsugamushi disease and tropical typhus in the federated Malay states: A preliminary note. part I. . *Trans R Soc Trop Med Hyg* **1928**, 22, 161-174, DOI:10.1016/S0035-9203(28)90008-5.
43. Fletcher, W.; Lesslar, J.E.;Lewthwaite, R.; The aetiology of the tsutsugamushi disease and tropical typhus in the federated Malay states. part II. *Trans R Soc Trop Med Hyg* **1929**, 23, 57-70, DOI:10.1016/S0035-9203(29)90849-X.
44. Audy, J.R.: *Red Mites and Typhus*. University of London, The Athlone Press: London, **1968**, x + 191.
45. Gater, B.A.R. Entomological investigations in relation to tropical typhus in Malaya. *Far Eastern Ass. of Trop. Med., Transac. 8th Cong., Siam* **1930**, 2, 132-141.
46. Nagayo, M.; Tamiya, T.; Mitamura, T.;Sato, K.; On the virus of tsutsugamushi disease and its demonstration by a new method. *Jikken Igaku Zasshi= Japanese Journal of Experimental Medicine* **1930**, 8, 309-318.
47. Dyer, R.E.; Ceder, E.T.; Lillie, R.D.; Rumreich, A.;Badger, L.F.; The experimental transmission of endemic typhus fever of the United States by the rat flea *Xenopsylla cheopis*. *Public Health Reports (1896-1970)* **1931**, 2481-2499.
48. Fulton, F.; Joyner, L.; Cultivation of rickettsia tsutsugamushi in lungs of rodents - preparation of a scrub-typhus vaccine. *Lancet* 1945, 249, 729-734.
49. Buckland, F.E.; Dudgeon, A.; Edward, D.G.; Henderson-Begg, A.; MacCallum, F.O.; Niven, J.; Rowlands, I.W.; Ende, M.; Bargmann, H.E.;Curtis, E.E.; Scrub-typhus vaccine: Large-scale production. *Lancet* 1945, 249, 734-737.
50. Chattopadhyay, S.; Jiang, J.; Chan, T.; Manetz, T.S.; Chao, C.; Ching, W.;Richards, A.L.; Scrub typhus vaccine candidate kp r56 induces humoral and cellular immune responses in cynomolgus monkeys. *Infect Immun* 2005, 73, 5039-5047, DOI: 10.4161/hv.3.3.4009.
51. Henderson-Begg, A.; Fulton, F.; The standardisation of a scrub typhus vaccine. *J Pathol Bacteriol* **1946**, 58, 381-389, DOI:10.1002/path.1700580308.
52. Ehrlich, J.; Bartz, Q.R.; Smith, R.M.; Joslyn, D.A.;Paul R. Burkholder; Chloromycetin, a new antibiotic from a soil actinomycete. *Science (Wash )* **1947**, 106, 417, DOI:10.1126/science.106.2757.417.
53. Smadel, J.E.; Jackson, E.B.; Chloromycetin, an antibiotic with chemotherapeutic activity in experimental rickettsial and viral infections. *Science (Wash )* **1947**, 106, 418-419, DOI:10.1126/science.106.2757.418.
54. Deller J. J. Fever of undetermined origin. In: *Internal Medicine in Vietnam*. Edited by Ognibene A.F., Barrett O. J.; , Wadhington, D.C., Office of the Surgeon General and Center of Military History United States Army, **1982**, 78-89.
55. Raoult, D.; Roux, V.; Ndiokubwayo, J.B.; Bise, G.; Baudon, D.; Martet, G.;Birtles, R.; Jail fever (epidemic typhus) outbreak in Burundi. *Emerg Infect Dis* **1997**, 3, 357-360, DOI:10.3201/eid0303.970313.

56. Raoult, D.; Ndiokubwayo, J.B.; Tissot-Dupont, H.; Roux, V.; Faugere, B.; Abegbinni, R.; Birtles, R.J.; Outbreak of epidemic typhus associated with trench fever in Burundi. *Lancet* **1998**, *352*, 353-358, DOI:10.1016/S0140-6736(97)12433-3.
